# Supplementary material
Source: PubMed Central journal article supplement (PMC1865411)
Supplement: bmj_39156.536968.55_1.pdf [file bmj_39156.536968.55_1.pdf]

## **BMJ Web references [as supplied by authors]**

- w1. Cleland JGF, Louis AA, Rigby AS, Janssen U, Balk AHMM, for the Trans-European Network-Home-Care Management System (TENS-HMS) Study. Non-invasive home telemonitoring for patients with heart failure at high risk of recurrent admission and death. *J Am Coll Cardiol* 2005; 45(10):1654-64.
- w2. Gattis WA, Hasselblad V, Whellan DJ, O'Connor CM. Reduction in heart failure events by the addition of a clinical pharmacist to the heart failure management team. *Arch Intern Med* 1999; 159:1939-45.
- w3. Rainville EC. Impact of pharmacist intervention on hospital readmissions for heart failure. *Am J Health Syst Pharm* 1999; 56:1339-42.
- w4. Barth V. A Nurse-Managed Discharge Program for Congestive Heart Failure Patients: Outcomes and Costs. *Home Health Care Management & Practice* 2001; 13(6):436-443.
- w5. Reigel B, Carlson B, Kopp Z, LePetri B, Glaser D, Unger A. Effect of a standardised nurse case-management telephone intervention on resource use in patients with chronic heart failure. *Arch Intern Med* 2002; 162(6):705-712.
- w6. Laramee A, Levinsky SK, Sargent J, Ross R, Callas P. Case management in a heterogeneous congestive heart failure population: a randomized controlled trial. *Arch Intern Med* 2003; 163:809-17.
- w7. Tsuyuki RT, Fradette M, Johnson JA, Bungard TJ, Eurich DT, Ashton T, Gordon W, Ikuta R, Kornder K, Mackay E, Manyari D, O'Reilley K, Semchuk W. A multicenter disease management program for hospitalized patients with heart failure. *J Cardiac Fail* 2004; 10(6):473-80.
- w8. DeBusk RF, Miller NH, Parker KM, Bandura A, Kraemer HC, Cher DJ, West JA, Fowler MB, Greenwald G. Care management for low-risk patients with heart failure: a randomized, controlled trial. *Ann Intern Med* 2004; 141(8):606-13.
- w9. GESICA Investigators. Randomised trial of telephone intervention in chronic heart: DIAL Trial. *BMJ* 2005; 331:425-7.
- w10. Riegel B, Carlson B, Glaser D, Romero T. Randomised controlled trial of telephone case management in Hispanics of Mexican origin with heart failure. *J Cardiac Fail* 2006; 12(3):211-218.
- w11. de Lusignan S, Wells S, Johnson P, Meredith K, Leatham E. Compliance and effectiveness of 1 year's home telemonitoring. The report of a pilot study of patients with chronic heart failure. *Eur J Heart Fail* 2001; 3:723-730.
- w12. Goldberg LR, Piette JD, Walsh MN, Frank TA, Jaski BE, Smith AL, Rodriguez R, Mancini DM, Hopton LA, Orav J, Loh E, on behalf of the WHARF investigators. Randomized trial of daily electronic home monitoring system in patients with

- advanced heart failure: The Weight Monitoring in Heart Failure (WHARF) trial. *Am Heart J* 2003; 146:705-12.
- w13. Woodend A, Sherrard H, Fraser M, Stuewe L, Haddad H, Cheung T, Struthers C. Getting Connected: Telehome Care for Patients with Heart Disease. *Canadian Journal of Home Economics* 2003; 52(2):19-28.
- w14. Capomolla S, Pinna G, La Rovere MT, Maestri R, Ceresa M, Ferrari M, Febo A, Caporotondi A, Guazzotti G, Lenta F, Baldin S, Mortara A, Cobelli F. Heart failure case disease management program: a pilot study of home telemonitoring versus usual care. *Eur Heart J Suppl* 2004; 6 (Supplement F):F91-F98.
